# Supplementary material
Source: PubMed Central journal article supplement (PMC10077129)
Supplement: jamacardiol-e230467-s001.pdf [file jamacardiol-e230467-s001.pdf]

## Supplementary Online Content

Han HC, Wang J, Birnie DH, et al. Association of the timing and extent of cardiac implantable electronic device infections with mortality. *JAMA Cardiol*. Published online April 5, 2023. doi:10.1001/jamacardio.2023.0467

**eFigure.** Stratified Analysis of Indexed Infection Rate

**eTable 1.** Baseline Characteristics According to the Combination of Timing and Extent of Infections

**eTable 2.** Microbiology of CIED Infections With Patient-Level and Organism-Level Data

**eTable 3.** Outcome Data According to the Timing and Extent of Infection

**eTable 4.** Outcome Data According to the Timing and Extent of Infection

This supplementary material has been provided by the authors to give readers additional information about their work.

**eFigure.** Stratified Analysis of Indexed Infection Rate

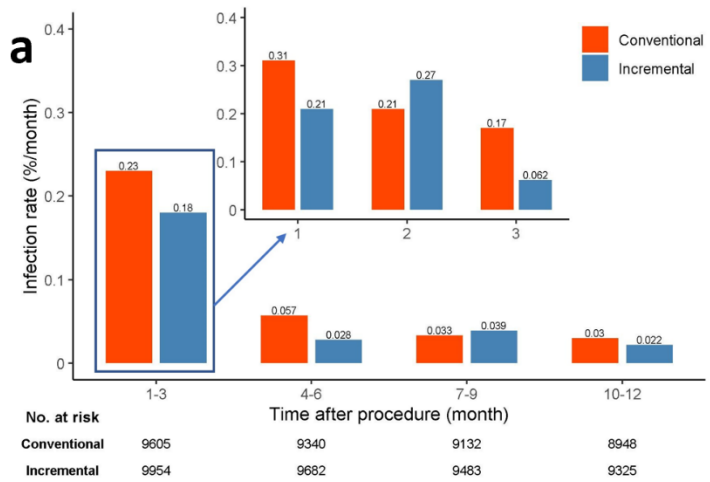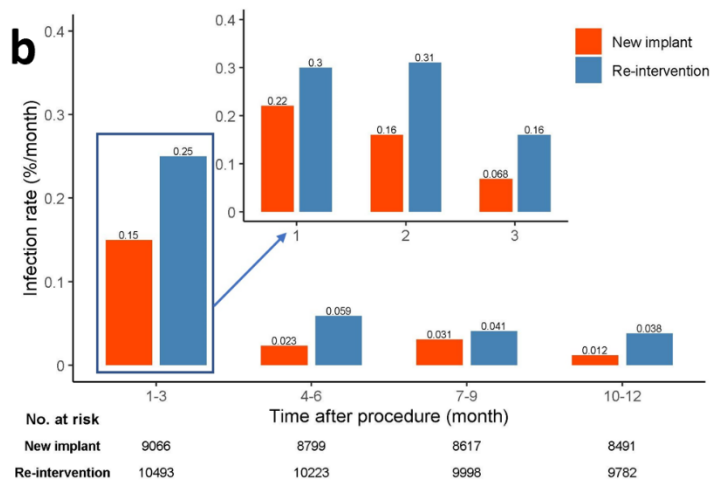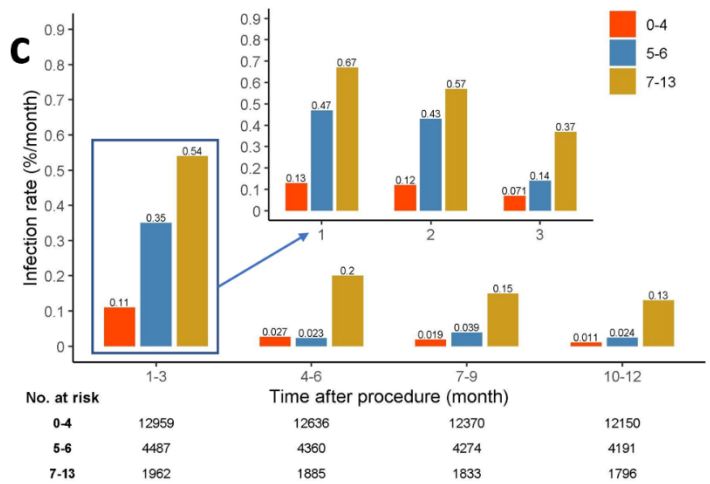

Indexed infection rate stratified according to: **a)** conventional or incremental antimicrobial treatment; **b)** initial implant or re-intervention; and **c)** PADIT risk score

**eTable 1.** Baseline Characteristics According to the Combination of Timing and Extent of Infections

|                                        | <b>Early localized (N=74)</b> | <b>Early systemic (N=45)</b> | <b>Delayed localized (N=35)</b> | <b>Delayed systemic (N=23)</b> | <b>P Value<sup>a</sup></b> |
|----------------------------------------|-------------------------------|------------------------------|---------------------------------|--------------------------------|----------------------------|
| <i>Demographics and history</i>        |                               |                              |                                 |                                |                            |
| Age                                    | 66.8±13.0                     | 70.6±10.5                    | 69.6±13.3                       | 69.7±14.4                      | 0.402                      |
| Female                                 | 18 (24.3)                     | 13 (28.9)                    | 7 (20.0)                        | 7 (30.4)                       | 0.758                      |
| Diabetes                               | 16 (21.6)                     | 17 (37.8)                    | 12 (34.3)                       | 10 (43.5)                      | 0.119                      |
| History of heart failure               | 39 (52.7)                     | 27 (60.0)                    | 16 (45.7)                       | 12 (52.2)                      | 0.650                      |
| Renal insufficiency                    | 15 (20.3)                     | 12 (26.7)                    | 7 (20.0)                        | 7 (30.4)                       | 0.673                      |
| Penicillin allergy                     | 11 (14.9)                     | 9 (20.0)                     | 6 (17.1)                        | 2 (8.7)                        | 0.668                      |
| Immuno-compromised                     | 3 (4.1)                       | 2 (4.4)                      | 1 (2.9)                         | 1 (4.3)                        | >0.999                     |
| <i>Type of procedure</i>               |                               |                              |                                 |                                |                            |
| New PM                                 | 5 (6.8)                       | 7 (15.6)                     | 0 (0.0)                         | 4 (17.4)                       | 0.024                      |
| New ICD                                | 9 (12.2)                      | 6 (13.3)                     | 1 (2.9)                         | 2 (8.7)                        | 0.393                      |
| PM generator replacement <sup>b</sup>  | 10 (13.5)                     | 5 (11.1)                     | 7 (20.0)                        | 2 (8.7)                        | 0.639                      |
| ICD generator replacement <sup>b</sup> | 12 (16.2)                     | 5 (11.1)                     | 5 (14.3)                        | 0 (0.0)                        | 0.182                      |
| CRT generator replacement <sup>b</sup> | 6 (8.1)                       | 7 (15.6)                     | 4 (11.4)                        | 4 (17.4)                       | 0.450                      |
| Revision <sup>b</sup> (pocket or lead) | 32 (43.2)                     | 10 (22.2)                    | 15 (42.9)                       | 6 (26.1)                       | 0.068                      |
| New CRT-P                              | 1 (1.4)                       | 1 (2.2)                      | 0 (0.0)                         | 1 (4.3)                        | 0.635                      |
| New CRT-D                              | 5 (6.8)                       | 6 (13.3)                     | 4 (11.4)                        | 5 (21.7)                       | 0.219                      |
| <i>Duration of procedure</i>           |                               |                              |                                 |                                |                            |
| <1 hr                                  | 39 (52.7)                     | 24 (53.3)                    | 24 (68.6)                       | 11 (47.8)                      |                            |
| 1-1.5 hrs                              | 18 (24.3)                     | 13 (28.9)                    | 7 (20.0)                        | 7 (30.4)                       |                            |
| >1.5 - 2 hrs                           | 9 (12.2)                      | 3 (6.7)                      | 2 (5.7)                         | 2 (8.7)                        |                            |
| > 2 hrs                                | 8 (10.8)                      | 5 (11.1)                     | 2 (5.7)                         | 2 (8.7)                        |                            |
| Other procedure on pocket              | 19 (25.7)                     | 9 (20.0)                     | 16 (45.7)                       | 5 (21.7)                       | 0.056                      |
| <i>Number of other procedures</i>      |                               |                              |                                 |                                |                            |
| 1 other procedure                      | 13 (17.6)                     | 4 (8.9)                      | 8 (22.9)                        | 2 (8.7)                        |                            |
| 2 other procedures                     | 5 (6.8)                       | 4 (8.9)                      | 6 (17.1)                        | 2 (8.7)                        |                            |
| > 2 other procedures                   | 1 (1.4)                       | 1 (2.2)                      | 2 (5.7)                         | 1 (4.3)                        |                            |
| Incremental antibiotics                | 34 (45.9)                     | 19 (42.2)                    | 16 (45.7)                       | 9 (39.1)                       | 0.933                      |

<sup>a</sup> P value is from ANOVA test for continuous variables and Chi-square test or Monte Carlo estimates of Fisher's exact test for categorical variables

<sup>b</sup> Replacement indicates generator change (when battery reaches elective replacement indicator or end of life); revision relates to interventions for device pocket (e.g. evacuation of significant hematoma) or lead (e.g. lead upgrade procedures or re-implantation of dislodged leads)

**eTable 2.** Microbiology of CIED Infections With Patient-Level and Organism-Level Data

**2a**

|                                       | Early localized (N=74) | Early systemic (N=45) | Delayed localized (N=35) | Delayed systemic (N=23) | P Value <sup>a</sup> |
|---------------------------------------|------------------------|-----------------------|--------------------------|-------------------------|----------------------|
| <b>Microbiology of infections</b>     |                        |                       |                          |                         |                      |
| Monomicrobial infections              | 40/74 (54.1)           | 33/45 (73.3)          | 13/35 (37.1)             | 17/23 (73.9)            | 0.004                |
| Polymicrobial infections              | 14/74 (18.9)           | 11/45 (24.4)          | 7/35 (20.0)              | 5/23 (21.7)             | 0.909                |
| No pathogen identified                | 20/74 (27.0)           | 1/45 (2.2)            | 15/35 (42.9)             | 1/23 (4.3)              | <0.001               |
|                                       |                        |                       |                          |                         |                      |
| <b>Susceptibility of pathogens</b>    |                        |                       |                          |                         |                      |
| Main pathogen sensitive to cefazolin  | 30/47 (63.8)           | 32/40 (80.0)          | 9/12 (75.0)              | 14/20 (70.0)            | 0.413                |
| Main pathogen sensitive to vancomycin | 47/53 (88.7)           | 42/44 (95.5)          | 17/19 (89.5)             | 18/21 (85.7)            | 0.528                |
| ≥1 pathogen sensitive to cefazolin    | 31/46 (67.4)           | 35/40 (87.5)          | 12/14 (85.7)             | 14/20 (70.0)            | 0.114                |
| ≥1 pathogen sensitive to vancomycin   | 50/54 (92.6)           | 43/44 (97.7)          | 19/19 (100)              | 18/21 (85.7)            | 0.160                |
| All pathogens sensitive to cefazolin  | 26/44 (59.1)           | 30/39 (76.9)          | 7/13 (53.8)              | 11/18 (61.1)            | 0.268                |
| All pathogens sensitive to vancomycin | 47/54 (87.0)           | 42/44 (95.5)          | 15/19 (78.9)             | 17/21 (81.0)            | 0.145                |

<sup>a</sup> P value is from Kruskal-Wallis test for continuous variables and Chi-square test or Monte Carlo estimates of Fisher's exact test for categorical variables

**2b**

|                                   | Early localized (N=72) <sup>a</sup> | Early systemic (N=78) <sup>a</sup> | Delayed localized (N=28) <sup>a</sup> | Delayed systemic (N=31) <sup>a</sup> | P Value <sup>b</sup> |
|-----------------------------------|-------------------------------------|------------------------------------|---------------------------------------|--------------------------------------|----------------------|
| <b>Gram-positive bacteria</b>     | 63/72 (87.5)                        | 75/78 (96.2)                       | 24/28 (85.7)                          | 26/31 (83.9)                         | 0.31                 |
| Staphylococcus aureus             | 12/72 (16.7)                        | 48/78 (61.5)                       | 7/28 (25.0)                           | 8/31 (25.8)                          | <0.001               |
| Coagulase-negative Staphylococcus | 38/72 (52.8)                        | 21/78 (26.9)                       | 11/28 (39.3)                          | 12/31 (38.7)                         | 0.05                 |
| Streptococcus pneumoniae          | 0/72 (0.0)                          | 0/78 (0.0)                         | 0/28 (0.0)                            | 1/31 (3.2)                           | -                    |
| Enterococcus sp.                  | 1/72 (1.4)                          | 1/78 (1.3)                         | 0/28 (0.0)                            | 2/31 (6.5)                           | -                    |
| Viridans streptococci             | 1/72 (1.4)                          | 2/78 (2.6)                         | 0/28 (0.0)                            | 2/31 (6.5)                           | -                    |
| Other streptococci                | 1/72 (1.4)                          | 1/78 (1.3)                         | 0/28 (0.0)                            | 0/31 (0.0)                           | -                    |
| Propionibacterium sp.             | 8/72 (11.1)                         | 1/78 (1.3)                         | 3/28 (10.7)                           | 0/31 (0.0)                           | -                    |
| Other gram-positive bacteria      | 2/72 (2.8)                          | 1/78 (1.3)                         | 3/28 (10.7)                           | 1/31 (3.2)                           | -                    |
| <b>Gram-negative bacteria</b>     | 7/72 (9.7)                          | 3/78 (3.8)                         | 3/28 (10.7)                           | 4/31 (12.9)                          | -                    |
| Escherichia coli                  | 0/72 (0.0)                          | 0/78 (0.0)                         | 0/28 (0.0)                            | 1/31 (3.2)                           | -                    |
| Klebsiella sp.                    | 0/72 (0.0)                          | 1/78 (1.3)                         | 0/28 (0.0)                            | 0/31 (0.0)                           | -                    |
| Serratia sp.                      | 0/72 (0.0)                          | 1/78 (1.3)                         | 0/28 (0.0)                            | 1/31 (3.2)                           | -                    |
| Enterobacter sp.                  | 4/72 (5.6)                          | 0/78 (0.0)                         | 0/28 (0.0)                            | 0/31 (0.0)                           | -                    |
| Other Enterobacteriaceae          | 1/72 (1.4)                          | 0/78 (0.0)                         | 0/28 (0.0)                            | 0/31 (0.0)                           | -                    |
| Pseudomonas aeruginosa            | 1/72 (1.4)                          | 1/78 (1.3)                         | 1/28 (3.6)                            | 2/31 (6.5)                           | -                    |
| Non-fermenting gram-negatives     | 0/72 (0.0)                          | 0/78 (0.0)                         | 2/28 (7.1)                            | 0/31 (0.0)                           | -                    |
| Other gram-negatives              | 1/72 (1.4)                          | 0/78 (0.0)                         | 0/28 (0.0)                            | 0/31 (0.0)                           | -                    |
| <b>Other pathogens</b>            | 2/72 (2.8)                          | 0/78 (0.0)                         | 1/28 (3.6)                            | 1/31 (3.2)                           | -                    |
| Anaerobes (not Propionibacterium) | 1/72 (1.4)                          | 0/78 (0.0)                         | 0/28 (0.0)                            | 1/31 (3.2)                           | -                    |
| Candida albicans                  | 1/72 (1.4)                          | 0/78 (0.0)                         | 1/28 (3.6)                            | 0/31 (0.0)                           | -                    |

<sup>a</sup> Number of organisms does not match number of patients due to presence of CIED infections without identifiable pathogens and polymicrobial infections

<sup>b</sup> P values were calculated for the variables with at least 20 cases using logistic mixed model to account for underlying correlation among microorganisms detected in the same patient

**eTable 3.** Outcome Data According to the Timing and Extent of Infection

|                                        | <b>Early localized<br/>(N=74)</b> | <b>Early systemic<br/>(N=45)</b> | <b>Delayed<br/>localized<br/>(N=35)</b> | <b>Delayed<br/>systemic<br/>(N=23)</b> | <b>P Value</b> |
|----------------------------------------|-----------------------------------|----------------------------------|-----------------------------------------|----------------------------------------|----------------|
| 30-day mortality <sup>a</sup> , n/N(%) | 0/74 (0.0)                        | 4/45 (8.9)                       | 3/34 (8.8)                              | 5/23 (21.7)                            | <0.001         |
| 90-day mortality <sup>a</sup> , n/N(%) | 2/74 (2.7)                        | 4/45 (8.9)                       | 3/34 (8.8)                              | 5/23 (21.7)                            | 0.024          |
| Length of hospitalization              | 11.0 (7.0-15.0)                   | 13.0 (7.0-32.0)                  | 12.0 (6.0-22.0)                         | 19.0 (6.0-30.0)                        | 0.017          |
| Stay in ICU/CCU                        | 11 (14.9)                         | 12 (26.7)                        | 6 (17.1)                                | 6 (26.1)                               | 0.361          |
| Length of stay                         | 6.0 (1.0-11.0)                    | 4.0 (2.0-7.0)                    | 9.0 (2.0-12.0)                          | 8.5 (5.0-12.0)                         | 0.383          |
| Surgical exploration or device explant | 67 (90.5)                         | 38 (84.4)                        | 33 (94.3)                               | 19 (82.6)                              | 0.388          |
| Duration of antibiotics                | 15.0 (10.0-24.0)                  | 28.0 (17.0-42.0)                 | 17.5 (10.0-34.0)                        | 28.0 (14.0-49.0)                       | 0.003          |

CCU, coronary care unit; ICU, intensive care unit.

Values are given as mean median (IQR) or n (%) unless otherwise indicated.

<sup>a</sup> Included patients with at least 30 (or 90) days follow-up after infection unless patient died

**eTable 4.** Outcome Data According to the Timing and Extent of Infection**4a**

|                                        | <b>All<br/>(N=177)</b> | <b>Early infection<br/>(N=119)</b> | <b>Late infection<br/>(N=58)</b> | <b>P value</b> |
|----------------------------------------|------------------------|------------------------------------|----------------------------------|----------------|
| 30-day mortality*, n/N(%)              | 12/176 (6.8)           | 4/119 (3.4)                        | 8/57 (14.0)                      | 0.020          |
| 90-day mortality*, n/N(%)              | 14/176 (8.0)           | 6/119 (5.0)                        | 8/57 (14.0)                      | 0.07           |
| Length of hospitalization              | 12.0 (7.0-21.0)        | 12.0 (7.0-18.0)                    | 13.0 (6.0-23.0)                  | 0.37           |
| Stay in ICU/CCU, n(%)                  | 35 (19.8)              | 23 (19.3)                          | 12 (20.7)                        | 0.83           |
| Length of stay in ICU/CCU              | 5.0 (2.0-11.0)         | 4.0 (1.0-9.0)                      | 9.0 (4.0-12.0)                   | 0.10           |
| Surgical exploration or device explant | 157 (88.7)             | 105 (88.2)                         | 52 (89.7)                        | 0.78           |
| Duration of antibiotics                | 20.0 (10.0-35.0)       | 20.0 (10.0-33.0)                   | 20.0 (10.0-42.0)                 | 0.37           |

**4b**

|                                        | <b>All<br/>(N=177)</b> | <b>Systemic infection<br/>(N=68)</b> | <b>Local infection<br/>(N=109)</b> | <b>P value</b> |
|----------------------------------------|------------------------|--------------------------------------|------------------------------------|----------------|
| 30-day mortality*, n/N(%)              | 12/176 (6.8)           | 9/68 (13.2)                          | 3/108 (2.8)                        | 0.012          |
| 90-day mortality*, n/N(%)              | 14/176 (8.0)           | 9/68 (13.2)                          | 5/108 (4.6)                        | 0.040          |
| Length of hospitalization              | 12.0 (7.0-21.0)        | 17.5 (7.0-31.0)                      | 11.0 (7.0-17.0)                    | 0.002          |
| Stay in ICU/CCU, n(%)                  | 35 (19.8)              | 18 (26.5)                            | 17 (15.6)                          | 0.08           |
| Length of stay in ICU/CCU              | 5.0 (2.0-11.0)         | 5.0 (3.0-10.0)                       | 7.0 (1.0-11.0)                     | 0.96           |
| Surgical exploration or device explant | 157 (88.7)             | 57 (83.5)                            | 100 (91.7)                         | 0.11           |
| Duration of antibiotics                | 20.0 (10.0-35.0)       | 28.0 (14.0-42.0)                     | 15.0 (10.0-28.0)                   | <0.001         |
