# Supplementary material
Source: PubMed Central journal article supplement (PMC10077129)
Supplement: jamacardiol-e230467-s002.pdf [file jamacardiol-e230467-s002.pdf]

## Data Sharing Statement

Han. Association of the Timing and Extent of Cardiac Implantable Electronic Device Infections With Mortality. *JAMA Cardiol.* Published April 05, 2023. doi:10.1001/jamacardio.2023.0467

### Data

**Data available:** No

### Additional Information

**Explanation for why data not available:** Aggregate data and study subject level queries are available on request from the corresponding author
